# Supplementary material for: Multiplex TaqMan® Quantitative PCR Assays for Host-Tick-Pathogen Studies Using the Guinea Pig-Tick-Rickettsia System
Source: MDPI journal article supplement (doi:10.3390/pathogens11050594), 2022-05-18
Supplement: s1 [file s1]

A.

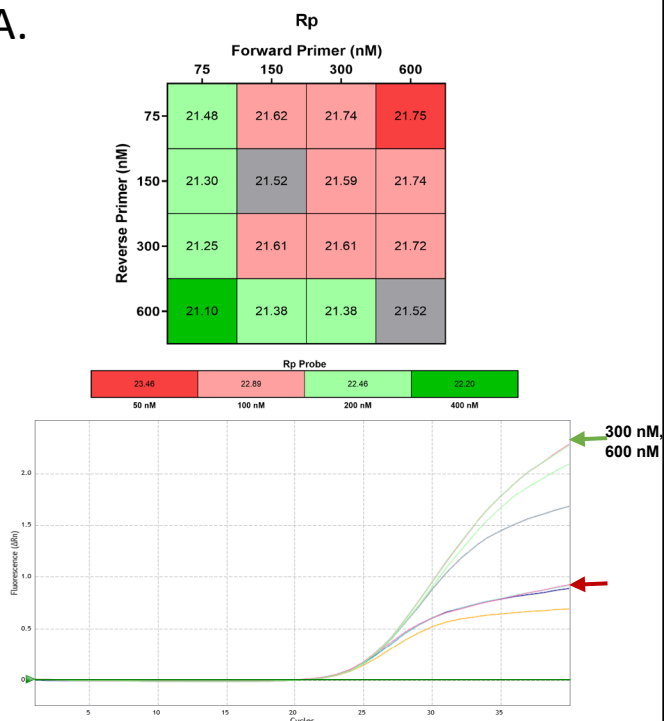

B.

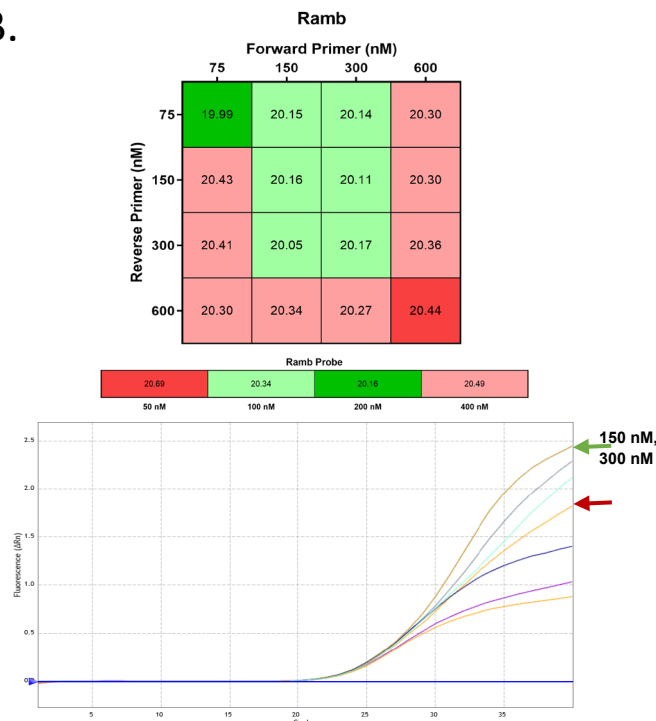

C.

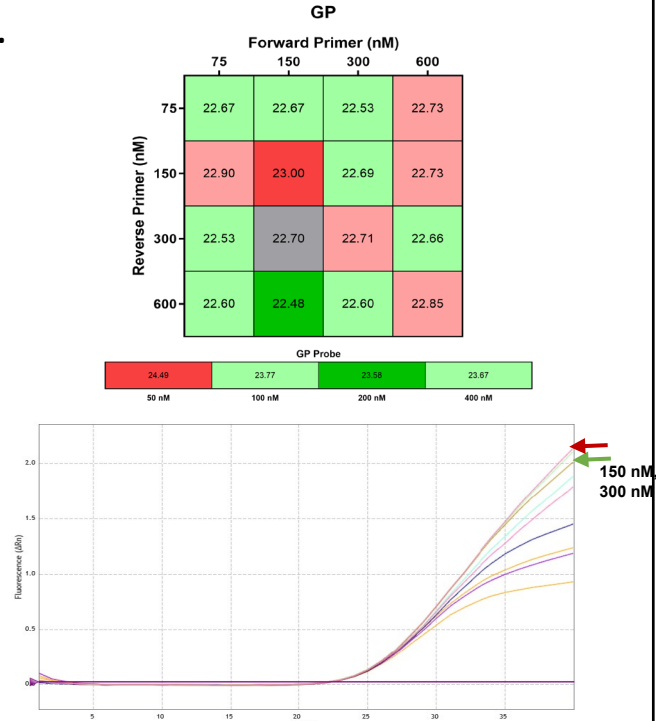

**Figure S1.(A).** The *R. parkeri* primer and probe optimization matrices (top) illustrate the optimal and lowest Cq (dark green) and highest Cq (dark red). Mean Cq values are gray. In the amplification curve, the optimal Rp primer concentration (300 nM, 600 nM) had a low Cq with a high  $\Delta Rn$  (green arrow); red arrow denotes primer concentrations that only had lowest Cq.

**Figure S1.(B).** The *R. amblyommatidis* primer and probe optimization matrixes (top) illustrate the optimal and lowest Cq (dark green) and highest Cq (dark red). In the amplification curves, the optimal Ramb primer concentration (150 nM, 300 nM) had a low Cq with a high  $\Delta Rn$  (green arrow); red arrow denotes primer concentrations that only had lowest Cq.

**Figure S1.(C).** The guinea pig primer and probe optimization matrices (top) illustrate the optimal and lowest Cq (dark green) and highest Cq (dark red). Mean Cq values are gray. In the amplification curves, the optimal GP primer concentration (150 nM, 300 nM) had a low Cq with a high  $\Delta Rn$  (green arrow); red arrow denotes primer concentrations that only had lowest Cq.

D.

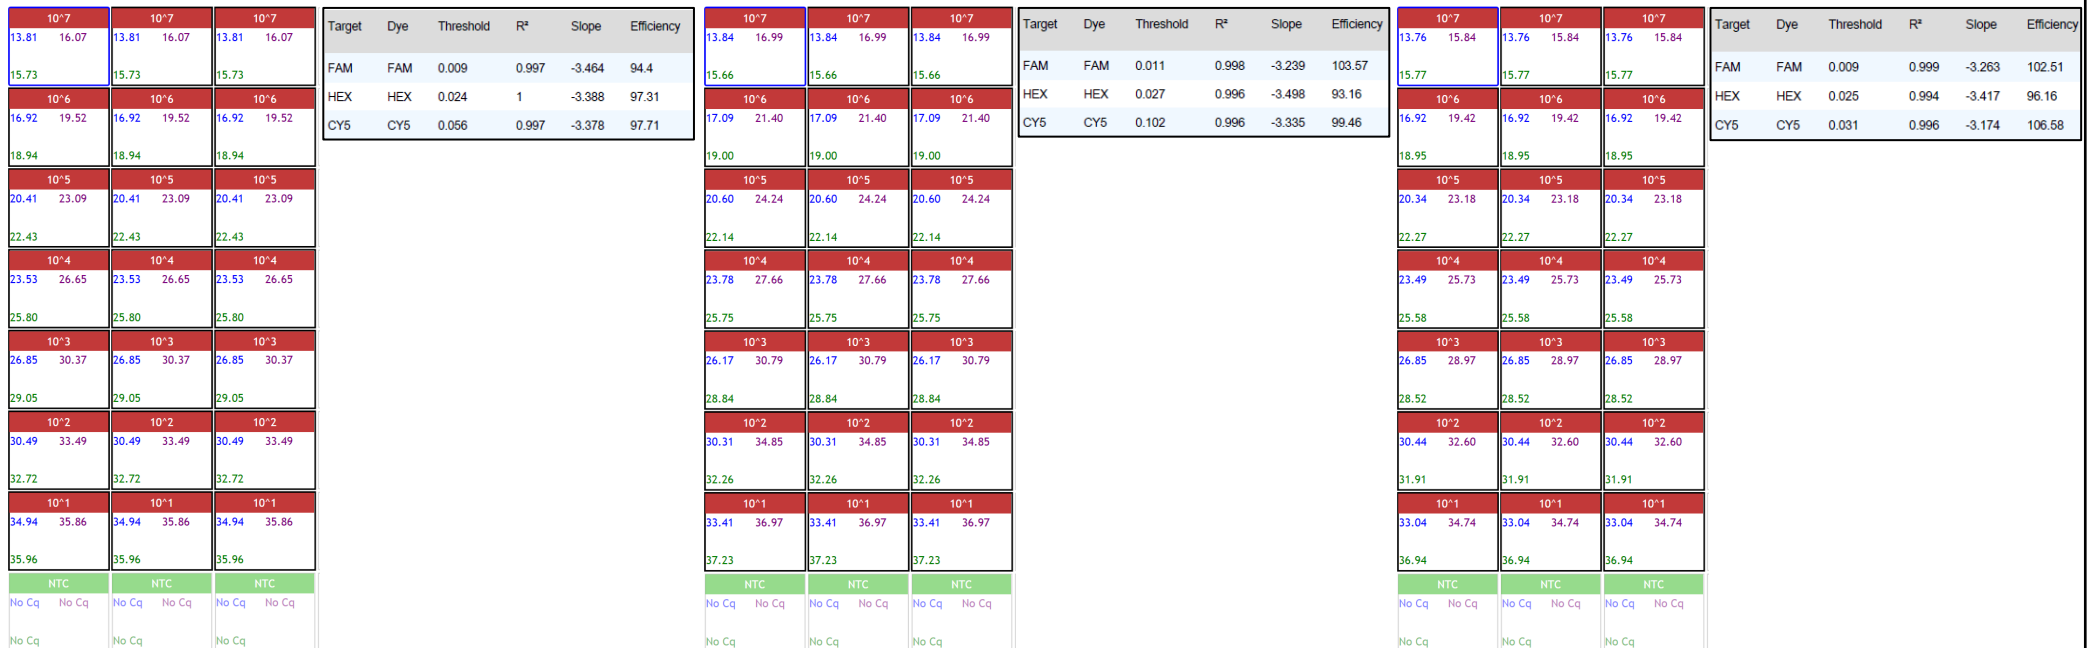

**Figure S1.(D).** Average Cq value for each target from concentrations of 10<sup>7</sup> to 10<sup>1</sup> of plasmids from HEX-labeled *R.parkeri* (green), FAM-labeled *R. amblyommatidis* (blue) and CY5-labeled GP (purple). Three plates tested in triplicates, shown here with efficiencies for each respective run next to image of Cq values.

A.

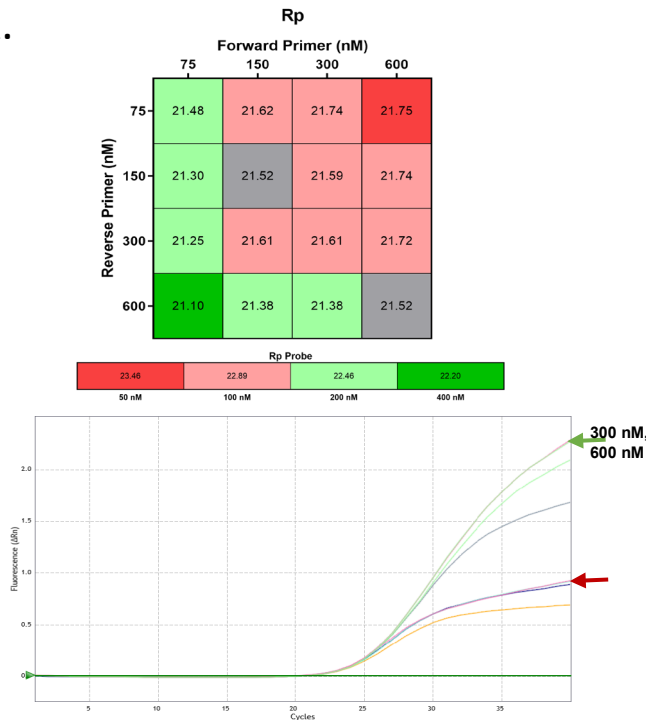

B.

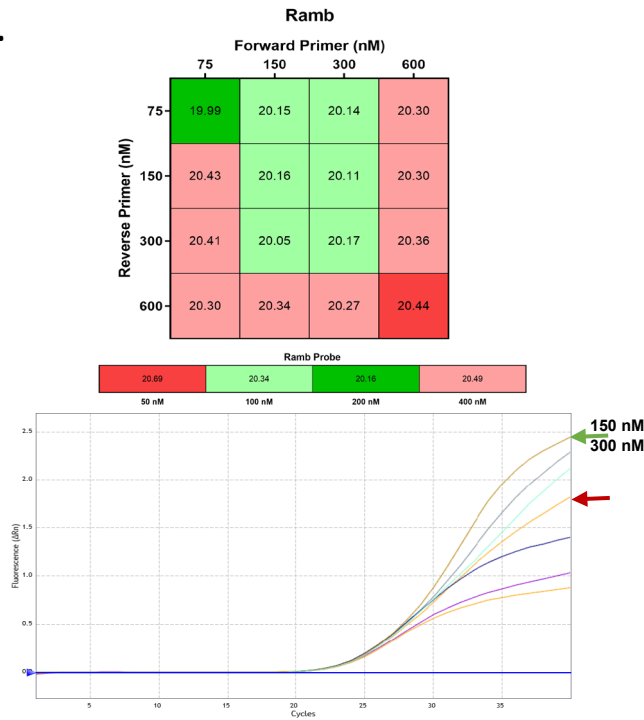

C.

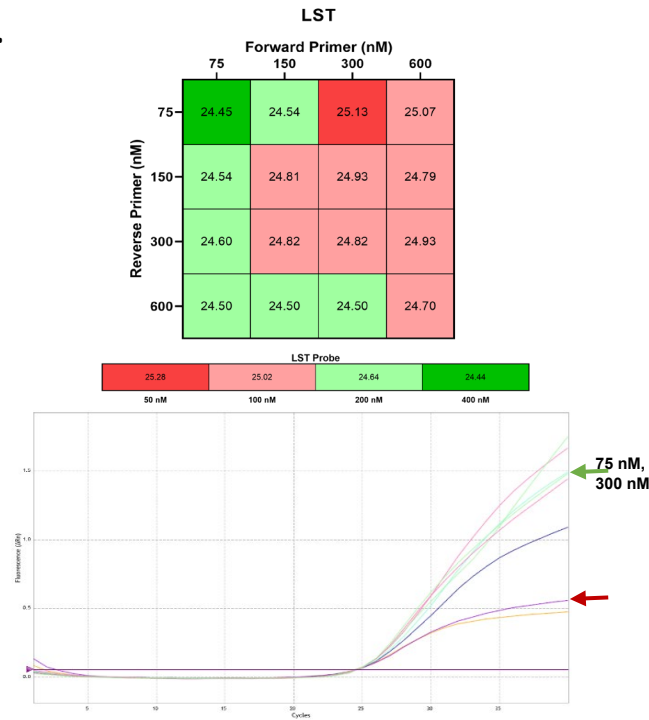

**Figure S2.(A).** The *R. parkeri* primer and probe optimization matrices (top) illustrate the optimal and lowest Cq (dark green) and highest Cq (dark red). Mean Cq values are gray. In the amplification curves, the optimal Rp primer concentration (300 nM, 600 nM) had a low Cq with a high ΔRn (green arrow); red arrow denotes primer concentrations that only had lowest Cq.

**Figure S2.(B).** The *R. amblyommatidis* primer and probe optimization matrices (top) illustrate the optimal and lowest Cq (dark green) and highest Cq (dark red). In the amplification curves, the optimal Ramb primer concentration (150 nM, 300 nM) had a low Cq with a high ΔRn (green arrow); red arrow denotes primer concentrations that only had lowest Cq.

**Figure S2.(C).** The lone star tick primer and probe optimization matrices (top) illustrate the optimal and lowest Cq (dark green) and highest Cq (dark red). In the amplification curves, the optimal LST primer concentration (75 nM, 300 nM) had a low Cq with a high ΔRn (green arrow); red arrow denotes primer concentrations that only had lowest Cq.

D.

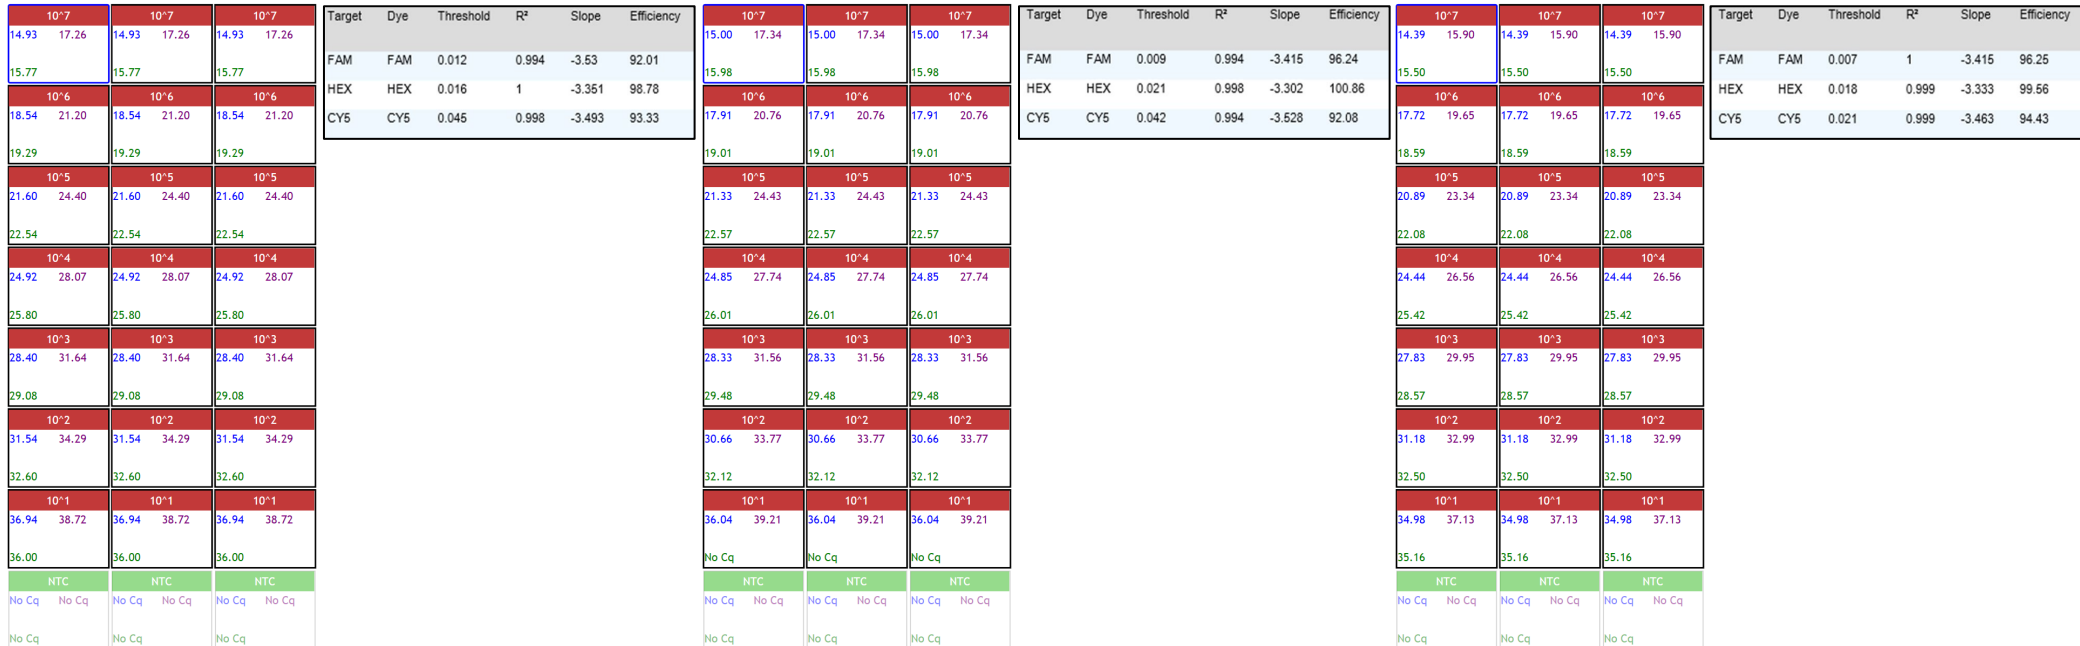

**Figure S2.(D).** Average Cq value for each target from concentrations of 10<sup>7</sup> to 10<sup>1</sup> of plasmids from HEX-labeled *R. parkeri* (green), FAM-labeled *R. amblyommatidis* (blue) and CY5-labeled LST (purple). Three plates tested in triplicates, shown here with efficiencies for each respective run next to image of Cq values.

A.

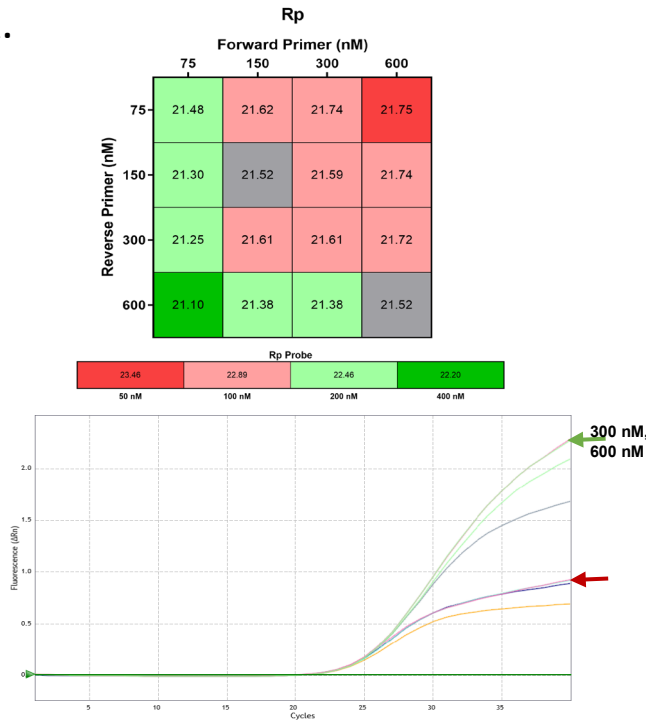

B.

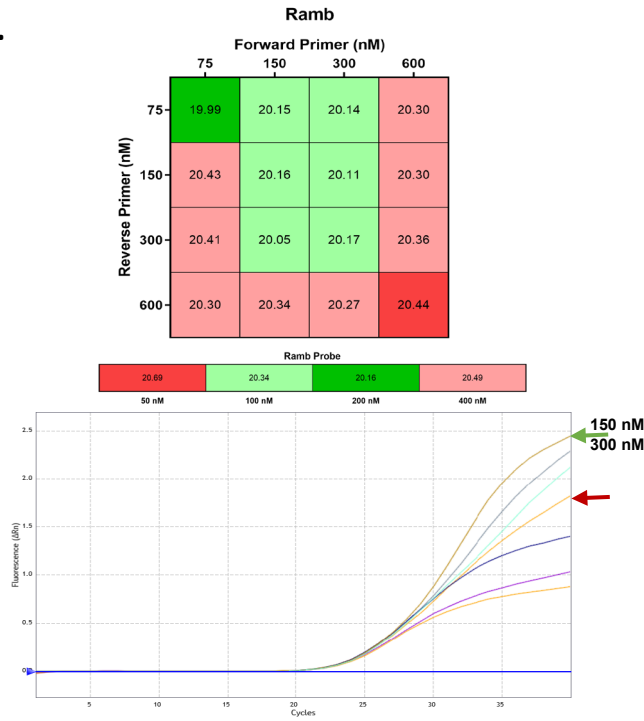

C.

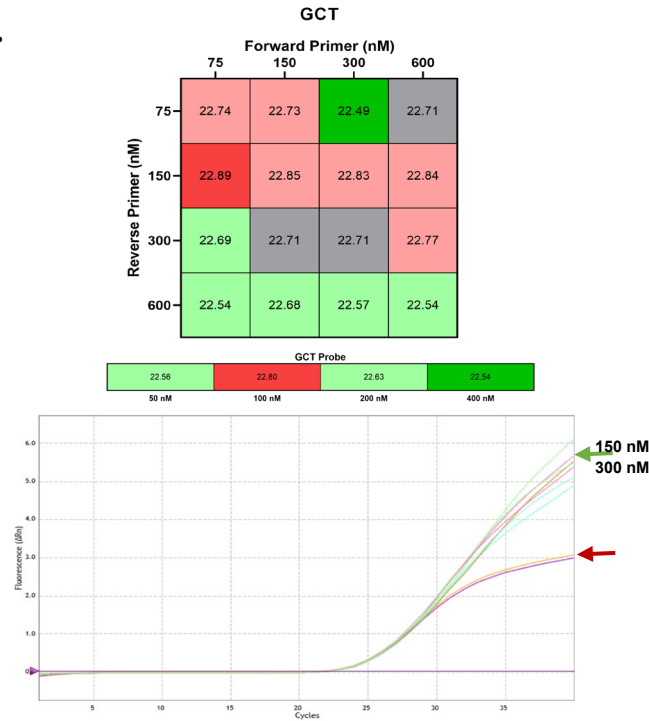

**Figure S3.(A).** The *R. parkeri* primer and probe optimization matrices (top) illustrate the optimal and lowest Cq (dark green) and highest Cq (dark red). Mean Cq values are gray. In the amplification curves, the optimal Rp primer concentration (300 nM, 600 nM) had a low Cq with a high ΔRn (green arrow); red arrow denotes primer concentrations that only had lowest Cq.

**Figure S3.(B).** The *R. amblyommatidis* primer and probe optimization matrices (top) illustrate the optimal and lowest Cq (dark green) and highest Cq (dark red). . In the amplification curves, the optimal Ramb primer concentration (150 nM, 300 nM) had a low Cq with a high ΔRn (green arrow); red arrow denotes primer concentrations that only had lowest Cq.

**Figure S3.(C).** The Gulf Coast tick primer and probe optimization matrices (top) illustrate the optimal and lowest Cq (dark green) and highest Cq (dark red). Mean Cq values are gray. In the amplification curves, the optimal GCT primer concentration (150 nM, 300 nM) had a low Cq with a high ΔRn (green arrow); red arrow denotes primer concentrations that only had lowest Cq.

D.

| 10 <sup>-7</sup> | 10 <sup>-7</sup> | 10 <sup>-7</sup> | Target | Dye | Threshold | R <sup>2</sup> | Slope  | Efficiency |
|------------------|------------------|------------------|--------|-----|-----------|----------------|--------|------------|
| 14.75            | 14.67            | 14.75            | FAM    | FAM | 0.01      | 0.994          | -3.415 | 96.27      |
| 15.92            | 15.92            | 15.92            | HEX    | HEX | 0.025     | 0.999          | -3.36  | 98.44      |
| 17.88            | 17.99            | 17.88            | CY5    | CY5 | 0.098     | 0.999          | -3.316 | 100.24     |
| 18.94            | 18.94            | 18.94            |        |     |           |                |        |            |
| 10 <sup>-5</sup> | 10 <sup>-5</sup> | 10 <sup>-5</sup> |        |     |           |                |        |            |
| 21.12            | 21.45            | 21.12            |        |     |           |                |        |            |
| 22.11            | 22.11            | 22.11            |        |     |           |                |        |            |
| 10 <sup>-4</sup> | 10 <sup>-4</sup> | 10 <sup>-4</sup> |        |     |           |                |        |            |
| 24.33            | 24.84            | 24.33            |        |     |           |                |        |            |
| 25.69            | 25.69            | 25.69            |        |     |           |                |        |            |
| 10 <sup>-3</sup> | 10 <sup>-3</sup> | 10 <sup>-3</sup> |        |     |           |                |        |            |
| 27.88            | 28.31            | 27.88            |        |     |           |                |        |            |
| 29.01            | 29.01            | 29.01            |        |     |           |                |        |            |
| 10 <sup>-2</sup> | 10 <sup>-2</sup> | 10 <sup>-2</sup> |        |     |           |                |        |            |
| 30.61            | 31.62            | 30.61            |        |     |           |                |        |            |
| 32.23            | 32.23            | 32.23            |        |     |           |                |        |            |
| 10 <sup>-1</sup> | 10 <sup>-1</sup> | 10 <sup>-1</sup> |        |     |           |                |        |            |
| 35.88            | 34.25            | 35.88            |        |     |           |                |        |            |
| 36.12            | 36.12            | 36.12            |        |     |           |                |        |            |
| NTC              | NTC              | NTC              |        |     |           |                |        |            |
| No Cq            | No Cq            | No Cq            |        |     |           |                |        |            |
| No Cq            | No Cq            | No Cq            |        |     |           |                |        |            |

| 10 <sup>-7</sup> | 10 <sup>-7</sup> | 10 <sup>-7</sup> |  |  |  |  |  |  |
|------------------|------------------|------------------|--|--|--|--|--|--|
| 14.58            | 14.24            | 14.58            |  |  |  |  |  |  |
| 15.28            | 15.28            | 15.28            |  |  |  |  |  |  |
| 10 <sup>-6</sup> | 10 <sup>-6</sup> | 10 <sup>-6</sup> |  |  |  |  |  |  |
| 17.59            | 17.65            | 17.59            |  |  |  |  |  |  |
| 18.44            | 18.44            | 18.44            |  |  |  |  |  |  |
| 10 <sup>-5</sup> | 10 <sup>-5</sup> | 10 <sup>-5</sup> |  |  |  |  |  |  |
| 20.41            | 20.93            | 20.41            |  |  |  |  |  |  |
| 21.29            | 21.29            | 21.29            |  |  |  |  |  |  |
| 10 <sup>-4</sup> | 10 <sup>-4</sup> | 10 <sup>-4</sup> |  |  |  |  |  |  |
| 23.59            | 24.47            | 23.59            |  |  |  |  |  |  |
| 24.63            | 24.63            | 24.63            |  |  |  |  |  |  |
| 10 <sup>-3</sup> | 10 <sup>-3</sup> | 10 <sup>-3</sup> |  |  |  |  |  |  |
| 26.77            | 27.62            | 26.77            |  |  |  |  |  |  |
| 27.78            | 27.78            | 27.78            |  |  |  |  |  |  |
| 10 <sup>-2</sup> | 10 <sup>-2</sup> | 10 <sup>-2</sup> |  |  |  |  |  |  |
| 29.81            | 30.78            | 29.81            |  |  |  |  |  |  |
| 30.63            | 30.63            | 30.63            |  |  |  |  |  |  |
| 10 <sup>-1</sup> | 10 <sup>-1</sup> | 10 <sup>-1</sup> |  |  |  |  |  |  |
| 33.75            | 34.79            | 33.75            |  |  |  |  |  |  |
| 33.75            | 33.75            | 33.75            |  |  |  |  |  |  |
| NTC              | NTC              | NTC              |  |  |  |  |  |  |
| No Cq            | No Cq            | No Cq            |  |  |  |  |  |  |
| No Cq            | No Cq            | No Cq            |  |  |  |  |  |  |

| Target | Dye | Threshold | R <sup>2</sup> | Slope  | Efficiency |
|--------|-----|-----------|----------------|--------|------------|
| FAM    | FAM | 0.011     | 0.998          | -3.153 | 107.56     |
| HEX    | HEX | 0.042     | 1              | -3.144 | 108.01     |
| CY5    | CY5 | 0.091     | 0.999          | -3.379 | 97.67      |

| 10 <sup>-7</sup> | 10 <sup>-7</sup> | 10 <sup>-7</sup> |  |  |  |  |  |  |
|------------------|------------------|------------------|--|--|--|--|--|--|
| 14.65            | 14.30            | 14.65            |  |  |  |  |  |  |
| 15.82            | 15.82            | 15.82            |  |  |  |  |  |  |
| 10 <sup>-6</sup> | 10 <sup>-6</sup> | 10 <sup>-6</sup> |  |  |  |  |  |  |
| 17.52            | 17.43            | 17.52            |  |  |  |  |  |  |
| 18.73            | 18.73            | 18.73            |  |  |  |  |  |  |
| 10 <sup>-5</sup> | 10 <sup>-5</sup> | 10 <sup>-5</sup> |  |  |  |  |  |  |
| 20.74            | 21.09            | 20.74            |  |  |  |  |  |  |
| 21.85            | 21.85            | 21.85            |  |  |  |  |  |  |
| 10 <sup>-4</sup> | 10 <sup>-4</sup> | 10 <sup>-4</sup> |  |  |  |  |  |  |
| 24.21            | 24.62            | 24.21            |  |  |  |  |  |  |
| 25.40            | 25.40            | 25.40            |  |  |  |  |  |  |
| 10 <sup>-3</sup> | 10 <sup>-3</sup> | 10 <sup>-3</sup> |  |  |  |  |  |  |
| 27.30            | 27.83            | 27.30            |  |  |  |  |  |  |
| 28.48            | 28.48            | 28.48            |  |  |  |  |  |  |
| 10 <sup>-2</sup> | 10 <sup>-2</sup> | 10 <sup>-2</sup> |  |  |  |  |  |  |
| 30.52            | 30.91            | 30.52            |  |  |  |  |  |  |
| 31.73            | 31.73            | 31.73            |  |  |  |  |  |  |
| 10 <sup>-1</sup> | 10 <sup>-1</sup> | 10 <sup>-1</sup> |  |  |  |  |  |  |
| 34.00            | 34.45            | 34.00            |  |  |  |  |  |  |
| 33.79            | 33.79            | 33.79            |  |  |  |  |  |  |
| NTC              | NTC              | NTC              |  |  |  |  |  |  |
| No Cq            | No Cq            | No Cq            |  |  |  |  |  |  |
| No Cq            | No Cq            | No Cq            |  |  |  |  |  |  |

| Target | Dye | Threshold | R <sup>2</sup> | Slope  | Efficiency |
|--------|-----|-----------|----------------|--------|------------|
| FAM    | FAM | 0.01      | 1              | -3.236 | 103.72     |
| HEX    | HEX | 0.053     | 0.998          | -3.151 | 107.65     |
| CY5    | CY5 | 0.095     | 0.999          | -3.363 | 98.31      |

**Figure S3.(D).** Average Cq value for each target from concentrations of 10<sup>7</sup> to 10<sup>1</sup> of plasmids from HEX-labeled *R. parkeri* (green), FAM-labeled *R. amblyommatidis* (blue), and CY5-labeled GCT (purple). Three plates tested in triplicates, shown here with efficiencies for each respective run next to image of Cq values.

**Table S1.** Complete list of reagents and resources.

| REAGENT <i>or</i> RESOURCE                             | VENDOR                     | CATALOG NUMBER                                                    |
|--------------------------------------------------------|----------------------------|-------------------------------------------------------------------|
| <b><i>Reagents</i></b>                                 |                            |                                                                   |
| Ampicillin                                             | Sigma-Aldrich              | A5354                                                             |
| BD Difco™ Dehydrated Culture Media: LB Broth, Miller   | Fisher Scientific          | DF0446-17-3                                                       |
| Blue/Orange Loading Dye, 6X                            | Promega                    | G1881                                                             |
| Brilliant Multiplex QPCR Master Mix                    | Agilent Technologies, Inc. | 600553                                                            |
| DNeasy® Blood & Tissue Kit (250)                       | Qiagen                     | 69506                                                             |
| Oxoid™ Agar Bacteriological                            | ThermoFisher Scientific    | LP0011T                                                           |
| TOPO™ TA Cloning™ Kit for Sequencing, with pCR™4-      | Invitrogen                 | K457502                                                           |
| TOPO™ Vector, One Shot™ TOP10 Chemically Competent     | Invitrogen                 | K457502                                                           |
| E. coli, and PureLink™ Quick Plasmid Miniprep Kit      | Invitrogen                 | K457502                                                           |
| Water, Molecular Biology Grade                         | Fisher Scientific          | BP2819-1                                                          |
| 100 bp DNA Ladder                                      | Invitrogen                 | 15628050                                                          |
| <b><i>Materials</i></b>                                |                            |                                                                   |
| AriaMx 96 Well Optical Plates                          | Agilent Technologies, Inc. | 401494                                                            |
| Falcon® 100 mm x 15 mm Petri Dish                      | Corning                    | 351029                                                            |
| Optical Cap, 8x Strip                                  | Agilent Technologies, Inc. | 401425                                                            |
| TempAssure 0.2 mL PCR 8-Tube Strips, Att. Optical Caps | USA Scientific             | 1402-3900                                                         |
| <b><i>Instruments and Software</i></b>                 |                            |                                                                   |
| Agilent AriaMx Real-Time PCR                           | Agilent Technologies, Inc. |                                                                   |
| Agilent AriaMx Software (version 1.71)                 | Agilent Technologies, Inc. | <a href="https://www.agilent.com/">https://www.agilent.com/</a>   |
| C1000 Touch Thermal Cycler                             | Bio-Rad                    | <a href="https://www.bio-rad.com/">https://www.bio-rad.com/</a>   |
| GraphPad Prism (version 9.1.2)                         | GraphPad Software          | <a href="https://www.graphpad.com/">https://www.graphpad.com/</a> |
| NanoDrop™ One                                          | ThermoFisher Scientific    | 701-058111                                                        |
| Powerpac 200 - For Electrophoresis & Blotting          | Bio-Rad                    | <a href="https://www.bio-rad.com/">https://www.bio-rad.com/</a>   |
| Qubit® 3.0 Fluorometer                                 | ThermoFisher Scientific    | Q33216                                                            |
| SnapGene®                                              | GSL Biotech LLC            | <a href="https://www.snapgene.com/">https://www.snapgene.com/</a> |
